# Supplementary material
Source: Springer Nature journal article supplement (https://www.springermedizin.de/resource/supplementary/12879_2010_1142_MOESM1_ESM.pdf/9441944)

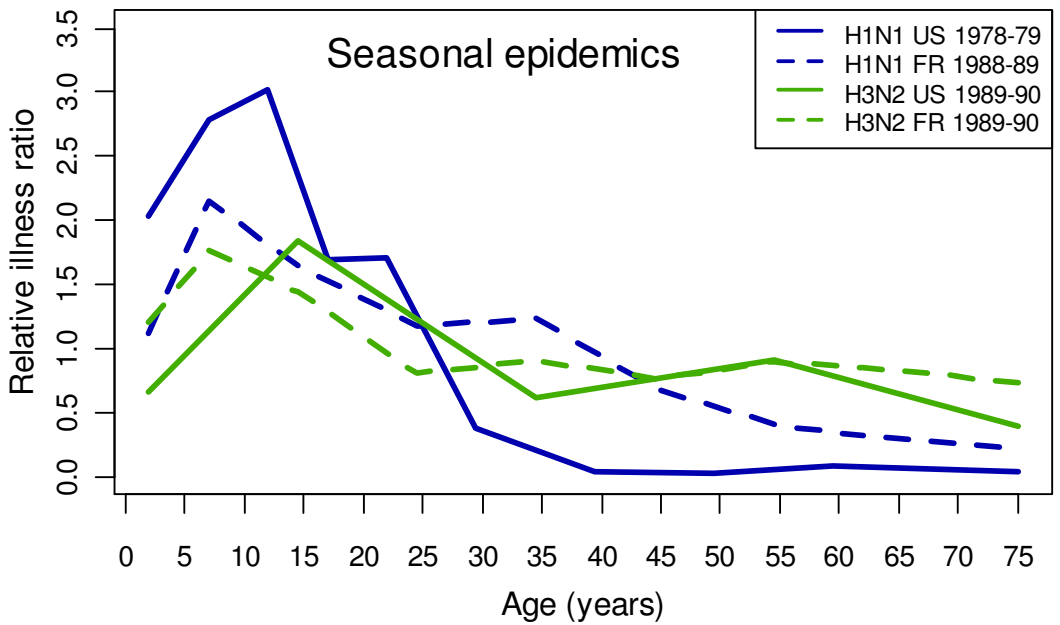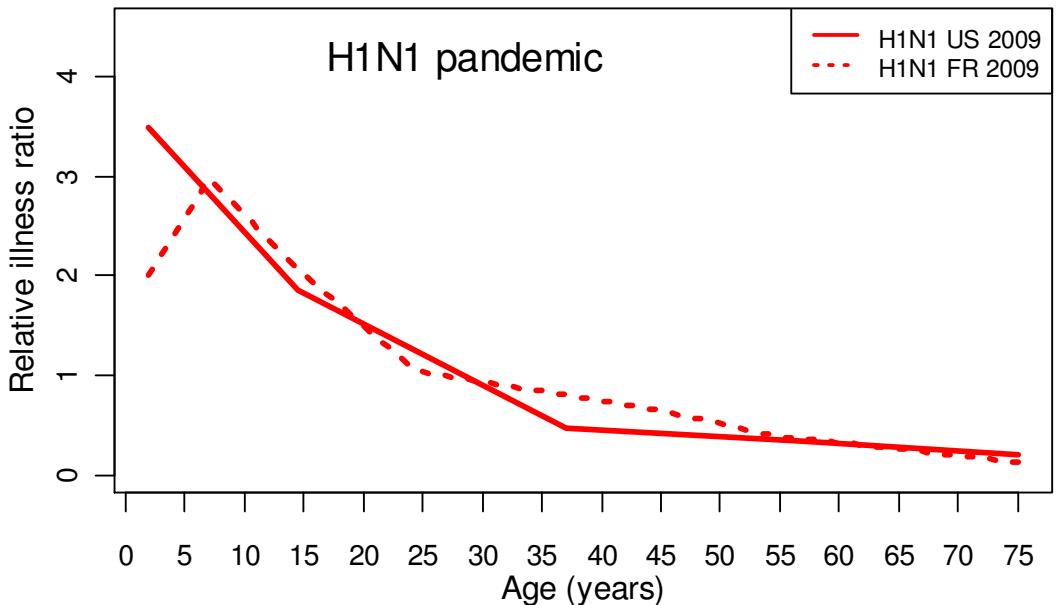

Relative illness ratio by age group, influenza season and country.

Supplement: MOESM1 [file 9441944]
